# Supplementary material
Source: publisher figshare collection journal article supplement (https://rs.figshare.com/ndownloader/files/20694930)
Supplement: Supplementary file 1 [file 20694930]

**Table S5**. *Resseliella* eggs and larvae found in the flowers of representative Schisandraceae; data for the three species of *Kadsura* from Luo et al. (2017). Numbers in parentheses represent the number of examined flowers. ♂ means male flower, ♀ means female flowers.

| **Species** | **Eggs/flower (N)** | **Larvae/flower (N)** | **Resin-secretion** | **Oviposition site** | **Flowering season** |
| --- | --- | --- | --- | --- | --- |
| *Illicium lanceolatum* | 12.9 ± 2.7 (15) | 10.1 ± 3.8 (15) | Filaments, base of inner tepals | Anther chamber, filament | Apr-Jun |
| *I. micranthum* | 6.4 ± 1.5 (10) | 4.3 ± 1.6 (10) | Filaments, base of inner tepals | Anther chamber, filament | Apr-Jun |
| *I. majus* | 14.1 ± 4.9 (10) | 13.9 ± 4.6 (10) | Filaments, base of inner tepals | Anther chamber, filament | Apr-May |
| *I. verum* | 40.5 ± 2.3 | 39.5 ± 3.9 | Filaments, base of inner tepals | Anther chamber, filament | Jul -Oct |
| *Kadsura coccinea* | 18.6 ± 1.3 (♂, 15) | 15. 4 ± 1.6 (♂, 15) | Thick inner tepals (♂) | On thick inner tepals (♂) | May-Jun |
|  | 16.9 ± 1.8 (♀, 10) | 15.8 ± 1.1 (♀, 10) | Thick inner tepals (♀) | On thick inner tepals (♀) |  |
| *K. heteroclita* | 14.1 ± 3.0 (♂, 10)  14.4 ± 5.2 (♀, 5) | 11.5 ± 2.3 (♂, 5)  3 ± 1.2 (♀, 5) | Connectives (♂)  Base of inner tepals (♀) | Space btw. adjacent connectives (♂)  Between carpels and tepal bases (♀) | Jun-Sept |
| *K. longipedunculata* | 7.3 ± 2.3 (♂, 10)  7 ± 2.3 (♀, 10) | 5.7 ± 2.2 (♂, 10)  2.6 ± 0.8 (♀, 10) | Connectives (♂)  Base of inner tepals (♀) | Space btw. adjacent connectives (♂)  Between carpels and tepal bases (♀) | Jun-Sep |
| *Schisandra sphenanthera* | 17.6 ± 5.3 (♂, 10)  17 ± 4.9 (♀, 10) | 16.1 ± 6.8 (♂, 10)  7.8 ± 3.1 (♀, 10) | Connectives (♂)  Base of inner tepals (♀) | Space btw. adjacent connectives Anther chamber (♂)  Base of inner tepals, on gynoecium (♀) | Apr-Jun |
| *Schisandra spec.* Wang_ZW 193 | 14.5 ± 3.3 (♂, 9)  8.8 ± 2.0 (♀, 9) | 11.4 ± 3.2 (♂, 9)  5.3 ± 1.5 (♀, 9) | Connectives (♂)  Base of inner tepals (♀) | Space btw. adjacent connectives Anther chamber (♂)  Base of inner tepals, on gynoecium (♀) | Apr-Jun |
